# Supplementary material
Source: publisher figshare collection journal article supplement (https://geolsoc.figshare.com/ndownloader/files/22411395)
Supplement: Supplementary file 1 [file 22411395]

## Sheet: Tabelle1
	Recommended				Measured					X-ray Lines
			SD					LLD [ppm]
SiO₂ (wt%)	72.3	±	0.51		72.4	±	0.5	94.3		SiO₂	Kα
TiO₂ (wt%)	0.25	±	0.03		0.2559	±	0.01	10		TiO₂	Kα
Al₂O₃ (wt%)	14.3	±	0.41		14.11	±	0.2	75.2		Al₂O₃	Kα
Fe₂O₃t (wt%)	2	±	0.1		1.972	±	0.1	71.9		Fe₂O₃t	Kβ
MgO (wt%)	0.69	±	0.07		0.7215	±	0.05	66.6		MgO	Kα
MnO (wt%)	0.057	±	0.007		0.05869	±	0.005	3.9		MnO	Kα
CaO (wt%)	2.13	±	0.08		2.15	±	0.1	37.7		CaO	Kα
Na₂O (wt%)	3.39	±	0.13		3.54	±	0.1	43.2		Na₂O	Kα
K₂O (wt%)	3.96	±	0.16		3.975	±	0.05	28.2		K₂O	Kα
P₂O₅ (wt%)	0.083	±	0.009		0.0967	±	0.01	24.9		P₂O₅	Kα
H₂O+ (wt%)	0.59	±	0.13
Sum	99.75				99.2798
Ba (ppm)	470	±	38		455.8	±	10	16.5		Ba	Lα
Ce (ppm)	45	±	5.1		45.6	±	4	8.4		Ce	Lβ
Co (ppm)	5.9	±	1.54		4.9	±	1	2.2		Co	Kα
Cr (ppm)	17.6	±	4.4		16.6	±	1	3.7		Cr	Kα
Cs (ppm)	10.6	±	0.65		11.3	±	2	5		Cs	Lα
Ga (ppm)	16.5	±	0.7		14.5	±	1	1.1		Ga	Lα
Gd (ppm)	4.08	±	0.63		5.6	±	2	1.2		Gd	Lα
La (ppm)	21.3	±	2.4		19.6	±	2	6.2		La	Lα
Nb (ppm)	11.4	±	0.98		12.5	±	1	1.7		Nb	Kα
Nd (ppm)	20.4	±	2.9		21.6	±	2	5.1		Nd	Lα
Ni (ppm)	6.91	±	1.9		11.8	±	1	1.6		Ni	Kα
Pb (ppm)	26.4	±	2.8		21.5	±	3	6		Pb	Lβ
Rb (ppm)	178	±	10		176.1	±	1	2		Rb	Kα
Sc (ppm)	6.21	±	0.49		6.2	±	2	5.5		Sc	Kα
Sn (ppm)	4.47	±	0.56		6.9	±	2	4		Sn	Kα
Sr (ppm)	187	±	12		177.6	±	1	1.8		Sr	Kα
Th (ppm)	12.8	±	1.5		12.2	±	1	2.9		Th	Lα
U (ppm)	4.69	±	1.09		5.2	±	1	3.7		U	Lα
V (ppm)	22.7	±	3.8		23.2	±	2	6.5		V	Kα
Y (ppm)	32.1	±	3.8		31.7	±	1	3		Y	Kα
Zn (ppm)	36.5	±	2.2		39.3	±	1	1.2		Zn	Kα
Zr (ppm)	118	±	13		118.5	±	2	4.3		Zr	Kβ
LLD = lower limit of detection
